# Supplementary material for: Robust photocatalytic activity of two-dimensional h-BN/Bi2O3 heterostructure quantum sheets
Source: Royal Society of Chemistry journal article supplement (doi:10.1039/d2ra02115c), 2022-01-01
Supplement: d2ra02115c1.pdf [file d2ra02115c1.pdf]

## Robust Photocatalytic Activity of Two-dimensional h-BN/Bi<sub>2</sub>O<sub>3</sub> Quantum Sheets Heterostructure

Jianwei Zhou<sup>a,b</sup>, Fangfang Duo<sup>a</sup>, Chubei Wang<sup>a</sup>, Liangliang Chu<sup>a</sup>, Mingliang Zhang<sup>a</sup>, Donglei Yan<sup>b</sup>

<sup>a</sup>Henan Photoelectrocatalytic Material and Micro-nano Application Technology Academician Workstation,

<sup>b</sup>College of Chemistry and Material Engineering, Xinxiang University, Xinxiang 453003, PR China

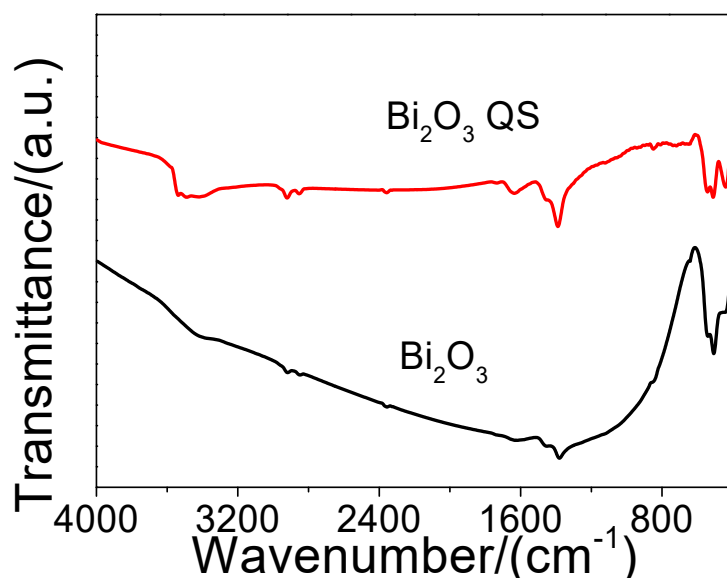

Figure S1 FT-IR spectra of raw Bi<sub>2</sub>O<sub>3</sub> and the obtained Bi<sub>2</sub>O<sub>3</sub> QS materials

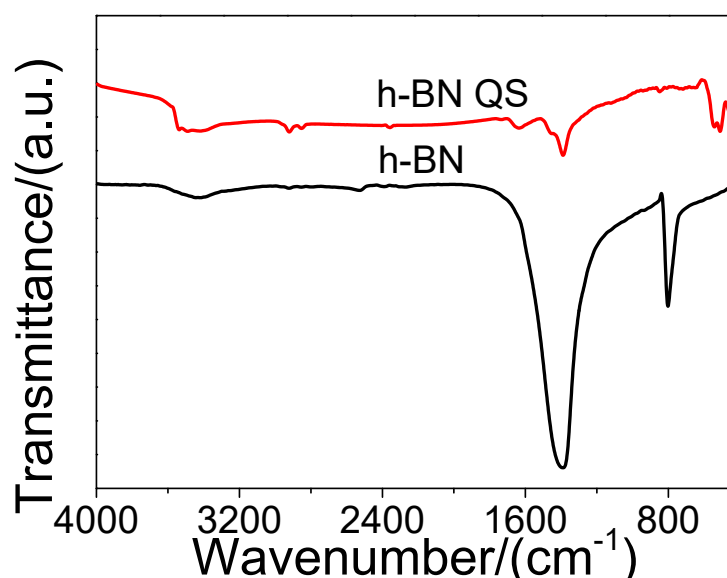

Figure S2 FT-IR spectra of raw h-BN and the obtained h-BN QS materials

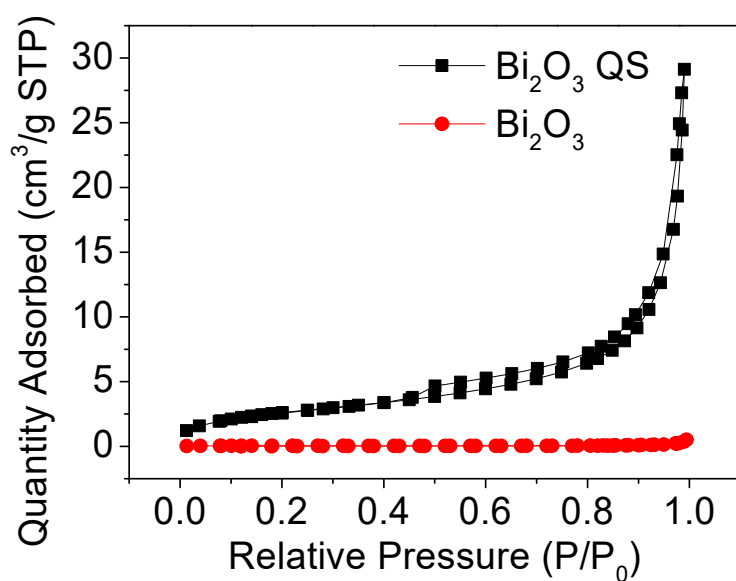

Figure S3 Nitrogen adsorption–desorption isotherms of  $\text{Bi}_2\text{O}_3$  and  $\text{Bi}_2\text{O}_3$  QS  
 ( $\text{Bi}_2\text{O}_3$   $S_{\text{BET}}=0.1367$   $\text{m}^2/\text{g}$ , Pore average size=23.6857 nm, Pore volume=0.000559  $\text{cm}^3/\text{g}$ ,  $\text{Bi}_2\text{O}_3$   
 QS  $S_{\text{BET}}=9.7916$   $\text{m}^2/\text{g}$ , Pore average size=17.3700 nm, Pore volume=0.045382  $\text{cm}^3/\text{g}$ )

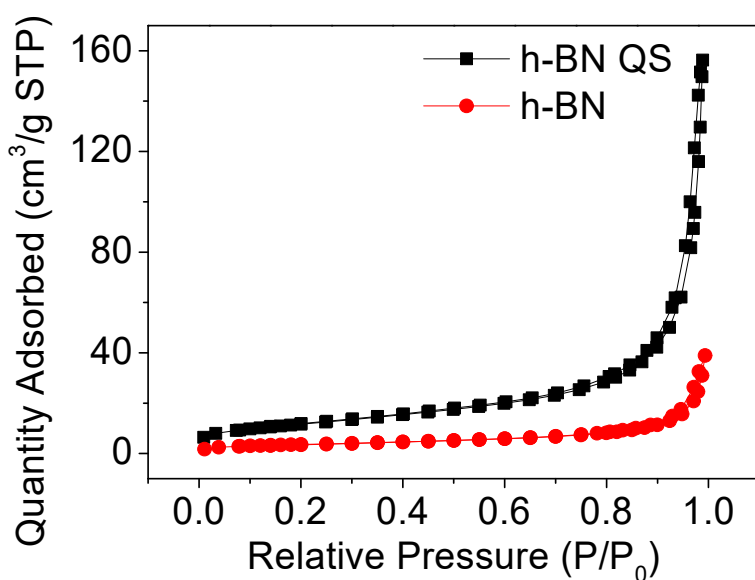

Figure S4 Nitrogen adsorption–desorption isotherms of h-BN and h-BN QS  
 (h-BN  $S_{\text{BET}}=12.9337$   $\text{m}^2/\text{g}$ , Pore average size=21.2712 nm, Pore volume=0.05944  $\text{cm}^3/\text{g}$ , h-BN  
 QS  $S_{\text{BET}}=41.3281$   $\text{m}^2/\text{g}$ , Pore average size=23.2663 nm, Pore volume=0.240388  $\text{cm}^3/\text{g}$ )

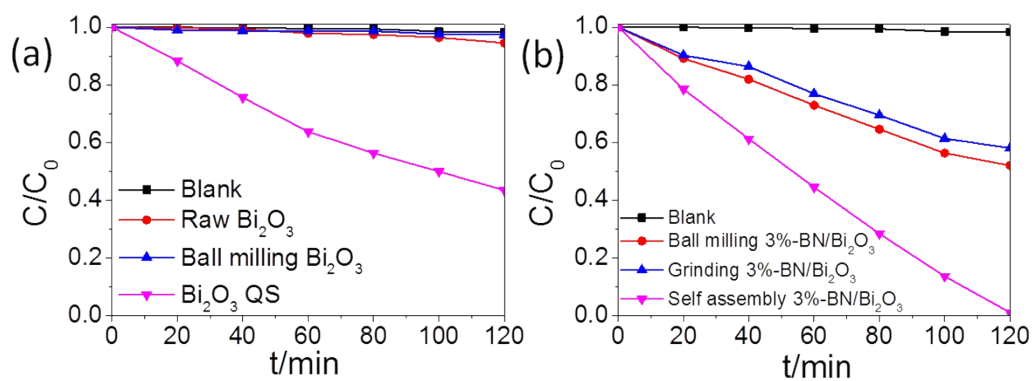

Figure S5 Correlation between preparation method and catalytic activity  
 (a) Pure  $\text{Bi}_2\text{O}_3$  samples and (b)  $\text{BN}/\text{Bi}_2\text{O}_3$  composites under visible-light irradiation ( $\lambda > 420 \text{ nm}$ )

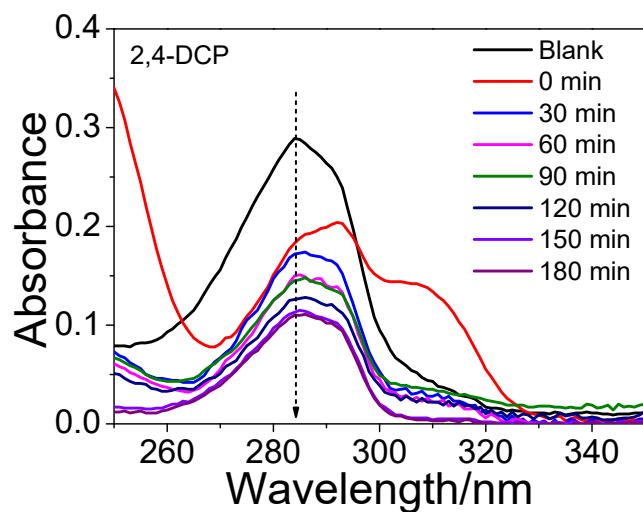

Figure S6 UV absorption spectra of 2, 4-dichlorophenol (2,4-DCP) solution over 3wt%- $\text{BN}/\text{Bi}_2\text{O}_3$  after visible light irradiation for different time periods

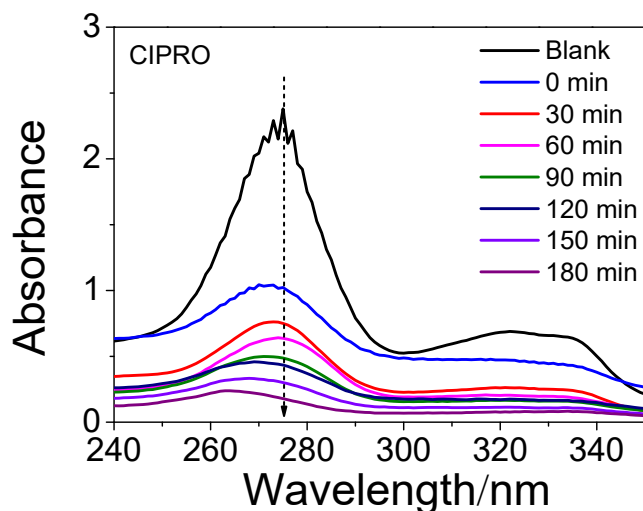

Figure S7 UV absorption spectra of ciprofloxacin hydrochloride (CIPRO) solution over 3wt%- $\text{BN}/\text{Bi}_2\text{O}_3$  after visible light irradiation for different time periods
